# Supplementary material for: Computational study on reactivity of cyclic organometallic dienes containing silicon, germanium and tin
Source: Royal Society of Chemistry journal article supplement (doi:10.1039/b515810a), 2006-01-01
Supplement: b515810a.pdf [file b515810a.pdf]

# Supplementary Material (ESI) for New Journal of Chemistry  
# This journal is (c) The Royal Society of Chemistry and  
# The Centre National de la Recherche Scientifique, 2006

## **Computational Study on reactivity of cyclic organometallic dienes containing silicon, germanium and tin**

Davor Margetić and Mirjana Eckert-Maksić

*Laboratory for Physical Organic Chemistry, Department of Organic Chemistry and Biochemistry, Ruder Bošković Institute, Bijenička c. 54, Zagreb.  
Croatia*

# Supplementary Material (ESI) for New Journal of Chemistry  
 # This journal is (c) The Royal Society of Chemistry and  
 # The Centre National de la Recherche Scientifique, 2006

**Table S1.** Total energies of reactants obtained by B3LYP/LANL2DZ (a.u.)

|          |                                                                                     | 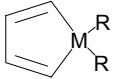 |           |  |            |
|----------|-------------------------------------------------------------------------------------|-----------------------------------------------------------------------------------|-----------|-------------------------------------------------------------------------------------|------------|
|          |                                                                                     | <i>R=H</i>                                                                        |           | <i>R=H</i>                                                                          |            |
|          |                                                                                     | <i>R=CH<sub>3</sub></i>                                                           |           | <i>R=CH<sub>3</sub></i>                                                             |            |
|          | <b>M</b>                                                                            |                                                                                   |           |                                                                                     |            |
| <b>1</b> | C                                                                                   | -194.07159                                                                        | <b>9</b>  | C                                                                                   | -233.38217 |
| <b>2</b> | Si                                                                                  | -159.84304                                                                        | <b>10</b> | Si                                                                                  | -164.93178 |
| <b>3</b> | Ge                                                                                  | -159.72211                                                                        | <b>11</b> | SiGe                                                                                | -164.81509 |
| <b>4</b> | Sn                                                                                  | -159.31171                                                                        | <b>12</b> | Ge                                                                                  | -164.69876 |
| <b>5</b> | C                                                                                   | -272.68522                                                                        | <b>13</b> | C                                                                                   | -390.60631 |
| <b>6</b> | Si                                                                                  | -238.49574                                                                        | <b>14</b> | Si                                                                                  | -322.22849 |
| <b>7</b> | Ge                                                                                  | -238.37146                                                                        | <b>15</b> | SiGe                                                                                | -322.10858 |
| <b>8</b> | Sn                                                                                  | -237.96086                                                                        | <b>16</b> | Ge                                                                                  | -321.98912 |
|          |  |                                                                                   |           |                                                                                     |            |
|          |                                                                                     | -307.318396                                                                       |           |                                                                                     |            |

# Supplementary Material (ESI) for New Journal of Chemistry  
 # This journal is (c) The Royal Society of Chemistry and  
 # The Centre National de la Recherche Scientifique, 2006

**Table S2.** Total energies of transition state structures obtained by B3LYP/LANL2DZ (a.u.)

| 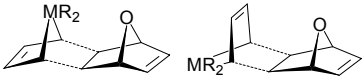 |    |                 |                  |  |       |                 |                  |
|-----------------------------------------------------------------------------------|----|-----------------|------------------|------------------------------------------------------------------------------------|-------|-----------------|------------------|
| <i>R=H</i>                                                                        |    |                 |                  | <i>R=H</i>                                                                         |       |                 |                  |
| TS                                                                                | M  | <i>exo,exo-</i> | <i>exo,endo-</i> | TS                                                                                 | M, L  | <i>exo,exo-</i> | <i>exo,endo-</i> |
| 1                                                                                 | C  | -501.357423     | -501.358543      | 9                                                                                  | C     | -540.660915     | -540.664334      |
| 2                                                                                 | Si | -467.123108     | -467.128282      | 10                                                                                 | Si    | -472.210795     | -472.212928      |
| 3                                                                                 | Ge | -467.001281     | -467.007756      | 11                                                                                 | Si Ge | -472.094589     | -472.097039      |
| 4                                                                                 | Sn | -466.593379     | -466.596111      | 12                                                                                 | Ge    | -471.977300     | -471.979142      |
| <i>R=CH<sub>3</sub></i>                                                           |    |                 |                  | <i>R=CH<sub>3</sub></i>                                                            |       |                 |                  |
| 5                                                                                 | C  | -579.948321     | -579.963009      | 13                                                                                 | C     | -697.862793     | -697.872781      |
| 6                                                                                 | Si | -545.767487     | -545.778962      | 14                                                                                 | Si    | -629.502953     | -629.507157      |
| 7                                                                                 | Ge | -545.645691     | -545.654342      | 15                                                                                 | Si Ge | -629.383999     | -629.387827      |
| 8                                                                                 | Sn | -545.238981     | -545.243176      | 16                                                                                 | Ge    | -629.266276     | -629.268057      |

# Supplementary Material (ESI) for New Journal of Chemistry  
 # This journal is (c) The Royal Society of Chemistry and  
 # The Centre National de la Recherche Scientifique, 2006

**Table S3.** B3LYP/LANL2DZ total energies of products (in a.u.)

|                         |          | Product         |                  |                  |           |             | Product          |                  |                  |
|-------------------------|----------|-----------------|------------------|------------------|-----------|-------------|------------------|------------------|------------------|
|                         |          | <i>Exo,exo-</i> | <i>Exo,endo-</i> | $\Delta\Delta E$ |           |             | <i>Exo,exo-</i>  | <i>Exo,endo-</i> | $\Delta\Delta E$ |
| <b>TS</b>               | <b>M</b> | <i>R=H</i>      |                  |                  | <b>TS</b> | <b>M, L</b> | $\Delta\Delta E$ |                  |                  |
| <b>1</b>                | C        | -501.43989      | -501.43377       | 16.1             | <b>9</b>  | C           | -540.76359       | -540.76069       | 7.4              |
| <b>2</b>                | Si       | -467.21245      | -467.20798       | 11.8             | <b>10</b> | Si          | -472.31716       | -472.31409       | 8.1              |
| <b>3</b>                | Ge       | -467.09545      | -467.09039       | 13.3             | <b>11</b> | Si Ge       | -472.20251       | -472.199286      | 8.5              |
| <b>4</b>                | Sn       | -466.69184      | -466.68199       | 25.9             | <b>12</b> | Ge          | -472.08799       | -472.08494       | 8.0              |
| <hr/>                   |          |                 |                  |                  |           |             |                  |                  |                  |
| <i>R=CH<sub>3</sub></i> |          |                 |                  |                  |           |             |                  |                  |                  |
| <b>5</b>                | C        | -580.04993      | -580.04232       | 32.5             | <b>13</b> | C           | -697.97353       | -697.97224       | 22.9             |
| <b>6</b>                | Si       | -545.85841      | -545.85653       | 2.9              | <b>14</b> | Si          | -629.60994       | -629.60842       | 4.0              |
| <b>7</b>                | Ge       | -545.73936      | -545.73843       | 2.4              | <b>15</b> | Si Ge       | -629.49237       | -629.49034       | 5.3              |
| <b>8</b>                | Sn       | -545.33764      | -545.33019       | 19.6             | <b>16</b> | Ge          | -629.37539       | -629.37276       | 6.9              |

# Supplementary Material (ESI) for New Journal of Chemistry  
 # This journal is (c) The Royal Society of Chemistry and  
 # The Centre National de la Recherche Scientifique, 2006

**Table S4.** Total energies of reactants obtained by B3LYP/LANL2DZ\* // B3LYP/LANL2DZ (a.u.)

|          |    | 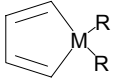   |           |  |             |
|----------|----|-------------------------------------------------------------------------------------|-----------|-------------------------------------------------------------------------------------|-------------|
|          |    | <i>R=H</i>                                                                          |           | <i>R=H</i>                                                                          |             |
| <b>M</b> |    |                                                                                     |           |                                                                                     |             |
| <b>1</b> | C  | -194.12427                                                                          | <b>9</b>  | C                                                                                   | -233.445586 |
| <b>2</b> | Si | -159.91135                                                                          | <b>10</b> | Si                                                                                  | -165.02132  |
| <b>3</b> | Ge | -159.77634                                                                          | <b>11</b> | SiGe                                                                                | -164.764495 |
| <b>4</b> | Sn | -159.35969                                                                          | <b>12</b> | Ge                                                                                  | -164.892518 |
|          |    | <i>R=CH<sub>3</sub></i>                                                             |           | <i>R=CH<sub>3</sub></i>                                                             |             |
| <b>5</b> | C  | -272.76089                                                                          | <b>13</b> | C                                                                                   | -233.445367 |
| <b>6</b> | Si | -238.57861                                                                          | <b>14</b> | Si                                                                                  | -165.02104  |
| <b>7</b> | Ge | -238.43831                                                                          | <b>15</b> | SiGe                                                                                | -164.76431  |
| <b>8</b> | Sn | -238.01917                                                                          | <b>16</b> | Ge                                                                                  | -164.89225  |
|          |    |  |           |                                                                                     |             |
|          |    | -307.39839                                                                          |           |                                                                                     |             |

# Supplementary Material (ESI) for New Journal of Chemistry  
 # This journal is (c) The Royal Society of Chemistry and  
 # The Centre National de la Recherche Scientifique, 2006

**Table S5.** Total energies of transition state structures obtained by  
 B3LYP/LANL2DZ\*/B3LYP/LANL2DZ (a.u.)

|  |          |                 |                  |  |             |                 |                  |  |             |                 |                  |  |             |                 |                  |
|-----------------------------------------------------------------------------------|----------|-----------------|------------------|-----------------------------------------------------------------------------------|-------------|-----------------|------------------|------------------------------------------------------------------------------------|-------------|-----------------|------------------|-------------------------------------------------------------------------------------|-------------|-----------------|------------------|
| <i>R=H</i>                                                                        |          |                 |                  | <i>R=H</i>                                                                        |             |                 |                  | <i>R=H</i>                                                                         |             |                 |                  |                                                                                     |             |                 |                  |
| <b>TS</b>                                                                         | <b>M</b> | <i>exo,exo-</i> | <i>exo,endo-</i> | <b>TS</b>                                                                         | <b>M, L</b> | <i>exo,exo-</i> | <i>exo,endo-</i> | <b>TS</b>                                                                          | <b>M, L</b> | <i>exo,exo-</i> | <i>exo,endo-</i> | <b>TS</b>                                                                           | <b>M, L</b> | <i>exo,exo-</i> | <i>exo,endo-</i> |
| <b>1</b>                                                                          | C        | -501.50347      | -501.50543       | <b>9</b>                                                                          | C           | -540.81767      | -540.82109       |                                                                                    |             |                 |                  |                                                                                     |             |                 |                  |
| <b>2</b>                                                                          | Si       | -467.28650      | -467.29371       | <b>10</b>                                                                         | Si          | -472.39615      | -472.39933       |                                                                                    |             |                 |                  |                                                                                     |             |                 |                  |
| <b>3</b>                                                                          | Ge       | -467.15087      | -467.15731       | <b>11</b>                                                                         | Si Ge       | -472.26706      | -472.27022       |                                                                                    |             |                 |                  |                                                                                     |             |                 |                  |
| <b>4</b>                                                                          | Sn       | -466.73275      | -466.73819       | <b>12</b>                                                                         | Ge          | -472.13923      | -472.14168       |                                                                                    |             |                 |                  |                                                                                     |             |                 |                  |
| <i>R=CH<sub>3</sub></i>                                                           |          |                 |                  | <i>R=CH<sub>3</sub></i>                                                           |             |                 |                  | <i>R=CH<sub>3</sub></i>                                                            |             |                 |                  |                                                                                     |             |                 |                  |
| <b>5</b>                                                                          | C        | -580.11923      | -580.13319       | <b>13</b>                                                                         | C           | -698.06450      | -698.07401       |                                                                                    |             |                 |                  |                                                                                     |             |                 |                  |
| <b>6</b>                                                                          | Si       | -545.94572      | -545.95765       | <b>14</b>                                                                         | Si          | -629.71801      | -629.72375       |                                                                                    |             |                 |                  |                                                                                     |             |                 |                  |
| <b>7</b>                                                                          | Ge       | -545.80664      | -545.81696       | <b>15</b>                                                                         | Si Ge       | -629.45239      | -629.45778       |                                                                                    |             |                 |                  |                                                                                     |             |                 |                  |
| <b>8</b>                                                                          | Sn       | -545.38999      | -545.39678       | <b>16</b>                                                                         | Ge          | -629.58447      | -629.59059       |                                                                                    |             |                 |                  |                                                                                     |             |                 |                  |

# Supplementary Material (ESI) for New Journal of Chemistry  
 # This journal is (c) The Royal Society of Chemistry and  
 # The Centre National de la Recherche Scientifique, 2006

**Table S6.** Total energies of reactants obtained by B3LYP/LANL2DZ\* (a.u.)

|          |    | 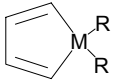   |           |  |             |
|----------|----|-------------------------------------------------------------------------------------|-----------|-------------------------------------------------------------------------------------|-------------|
|          |    | <i>R=H</i>                                                                          |           | <i>R=H</i>                                                                          |             |
| <b>M</b> |    |                                                                                     |           |                                                                                     |             |
| <b>1</b> | C  | -194.12427                                                                          | <b>9</b>  | C                                                                                   | -233.44559  |
| <b>2</b> | Si | -159.91135                                                                          | <b>10</b> | Si                                                                                  | -165.02132  |
| <b>3</b> | Ge | -159.77634                                                                          | <b>11</b> | SiGe                                                                                | -164.89252  |
| <b>4</b> | Sn | -159.35969                                                                          | <b>12</b> | Ge                                                                                  | -164.764495 |
|          |    | <i>R=CH<sub>3</sub></i>                                                             |           | <i>R=CH<sub>3</sub></i>                                                             |             |
| <b>5</b> | C  | -272.76126                                                                          | <b>13</b> | C                                                                                   | -390.71506  |
| <b>6</b> | Si | -238.57926                                                                          | <b>14</b> | Si                                                                                  | -322.35076  |
| <b>7</b> | Ge | -238.43858                                                                          | <b>15</b> | SiGe                                                                                | -322.21682  |
| <b>8</b> | Sn | -238.01952                                                                          | <b>16</b> | Ge                                                                                  | -322.08378  |
|          |    |  |           |                                                                                     |             |
|          |    | -307.400098                                                                         |           |                                                                                     |             |

# Supplementary Material (ESI) for New Journal of Chemistry  
 # This journal is (c) The Royal Society of Chemistry and  
 # The Centre National de la Recherche Scientifique, 2006

**Table S7.** Total energies of transition state structures obtained by B3LYP/LANL2DZ\* (a.u.)

|  |    |                 |                  |  |       |                 |                  |
|-----------------------------------------------------------------------------------|----|-----------------|------------------|------------------------------------------------------------------------------------|-------|-----------------|------------------|
| <i>R=H</i>                                                                        |    |                 |                  | <i>R=H</i>                                                                         |       |                 |                  |
| TS                                                                                | M  | <i>exo,exo-</i> | <i>exo,endo-</i> | TS                                                                                 | M, L  | <i>exo,exo-</i> | <i>exo,endo-</i> |
| 1                                                                                 | C  | -501.50726      | -501.51015       | 9                                                                                  | C     |                 | -540.82549       |
| 2                                                                                 | Si | -467.29035      | -467.29754       | 10                                                                                 | Si    |                 | -472.40249       |
| 3                                                                                 | Ge | -467.15429      | -467.16042       | 11                                                                                 | Si Ge |                 | -472.27431       |
| 4                                                                                 | Sn | -466.73714      | -466.74195       | 12                                                                                 | Ge    |                 | -472.14435       |
| <i>R=CH<sub>3</sub></i>                                                           |    |                 |                  | <i>R=CH<sub>3</sub></i>                                                            |       |                 |                  |
| 5                                                                                 | C  | -580.12279      | -580.13728       | 13                                                                                 | C     |                 | -698.08006       |
| 6                                                                                 | Si | -545.94981      | -545.96186       | 14                                                                                 | Si    | -629.72307      | -629.72835       |
| 7                                                                                 | Ge | -545.81091      | -545.82028       | 15                                                                                 | Si Ge | -629.58953      | -629.59514       |
| 8                                                                                 | Sn | -545.39429      | -545.40061       | 16                                                                                 | Ge    | -629.45749      |                  |



# Supplementary Material (ESI) for New Journal of Chemistry  
 # This journal is (c) The Royal Society of Chemistry and  
 # The Centre National de la Recherche Scientifique, 2006

**Table S8.** AM1 activation energies in  $\text{kJmol}^{-1}$

| TS | M  | <i>exo,exo-</i> | <i>exo,endo-</i> | TS |           | <i>exo,exo-</i> | <i>exo,endo-</i> |
|----|----|-----------------|------------------|----|-----------|-----------------|------------------|
| 1  | C  | 138.7           | 134.6            | 9  | M=L=C     | 143.5           | 138.1            |
| 2  | Si | 179.0           | 149.3            | 10 | M=L=Si    | 186.3           | 166.6            |
| 3  | Ge | 140.9           | 135.4            | 11 | M=Si,L=Ge | 166.1           | 149.6            |
| 4  | Sn | 174.7           | 157.5            | 12 | M=L=Ge    | 146.6           | 137.9            |

# Supplementary Material (ESI) for New Journal of Chemistry  
 # This journal is (c) The Royal Society of Chemistry and  
 # The Centre National de la Recherche Scientifique, 2006

**Table S9.** B3LYP/LANL2DZ reactions' energies  $\Delta H_{\text{rxn}}$  (in  $\text{kJmol}^{-1}$ )

| 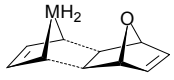 |    |                 |                  |  |       |                 |                  |  |       |                 |                  |  |      |                 |                  |
|-----------------------------------------------------------------------------------|----|-----------------|------------------|-----------------------------------------------------------------------------------|-------|-----------------|------------------|------------------------------------------------------------------------------------|-------|-----------------|------------------|-------------------------------------------------------------------------------------|------|-----------------|------------------|
| R=H                                                                               |    |                 |                  | R=H                                                                               |       |                 |                  | R=CH <sub>3</sub>                                                                  |       |                 |                  |                                                                                     |      |                 |                  |
| TS                                                                                | M  | <i>exo,exo-</i> | <i>exo,endo-</i> | TS                                                                                | M, L  | <i>exo,exo-</i> | <i>exo,endo-</i> | TS                                                                                 | M, L  | <i>exo,exo-</i> | <i>exo,endo-</i> | TS                                                                                  | M, L | <i>exo,exo-</i> | <i>exo,endo-</i> |
| <b>1</b>                                                                          | C  | -131.0          | -114.9           | <b>9</b>                                                                          | C     | -165.5          | -158.1           | <b>13</b>                                                                          | C     | -128.2          | -105.3           | <b>5</b>                                                                            | C    | -121.6          | -89.1            |
| <b>2</b>                                                                          | Si | -133.9          | -122.1           | <b>10</b>                                                                         | Si    | -175.9          | -167.8           | <b>14</b>                                                                          | Si    | -165.5          | -161.5           | <b>6</b>                                                                            | Si   | -116.2          | -113.3           |
| <b>3</b>                                                                          | Ge | -144.3          | -131.0           | <b>11</b>                                                                         | Si Ge | -181.2          | -172.8           | <b>15</b>                                                                          | Si Ge | -171.9          | -166.6           | <b>7</b>                                                                            | Ge   | -129.9          | -127.5           |
| <b>4</b>                                                                          | Sn | -136.2          | -110.3           | <b>12</b>                                                                         | Ge    | -185.9          | -177.9           | <b>16</b>                                                                          | Ge    | -178.2          | -168.3           | <b>8</b>                                                                            | Sn   | -153.3          | -133.7           |

**Table S10.** B3LYP/LANL2DZ FMO orbital energies in eV

|                         |      | 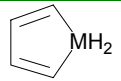 |       |  |           |       |       |
|-------------------------|------|-----------------------------------------------------------------------------------|-------|-----------------------------------------------------------------------------------|-----------|-------|-------|
| M                       | HOMO | LUMO                                                                              |       | HOMO                                                                              | LUMO      |       |       |
| <i>R=H</i>              |      |                                                                                   |       |                                                                                   |           |       |       |
| <b>1</b>                | C    | -5.91                                                                             | -0.56 | <b>9</b>                                                                          | M=L=C     | -5.71 | -0.73 |
| <b>2</b>                | Si   | -6.35                                                                             | -1.53 | <b>10</b>                                                                         | M=L=Si    | -6.49 | -1.67 |
| <b>3</b>                | Ge   | -6.36                                                                             | -1.50 | <b>11</b>                                                                         | M=Si,L=Ge | -6.49 | -1.65 |
| <b>4</b>                | Sn   | -6.35                                                                             | -1.53 | <b>12</b>                                                                         | M=L=Ge    | -6.49 | -1.64 |
| <i>R=CH<sub>3</sub></i> |      |                                                                                   |       |                                                                                   |           |       |       |
| <b>5</b>                | C    | -5.83                                                                             | -0.63 | <b>13</b>                                                                         | M=L=C     | -5.69 | -0.73 |
| <b>6</b>                | Si   | -6.09                                                                             | -1.31 | <b>14</b>                                                                         | M=L=Si    | -6.14 | -1.37 |
| <b>7</b>                | Ge   | -6.09                                                                             | -1.27 | <b>15</b>                                                                         | M=Si,L=Ge | -6.12 | -1.35 |
| <b>8</b>                | Sn   | -6.08                                                                             | -1.30 | <b>16</b>                                                                         | M=L=Ge    | -6.10 | -1.33 |

I=HOMO<sub>(diene)</sub>-LUMO<sub>(alkene)</sub>; II=HOMO<sub>(alkene)</sub>-LUMO<sub>(diene)</sub>  
 7oxaNBD: HOMO=-6.19, LUMO= -0.95 eV

# Supplementary Material (ESI) for New Journal of Chemistry  
 # This journal is (c) The Royal Society of Chemistry and  
 # The Centre National de la Recherche Scientifique, 2006

**Table S11.** B3LYP/LANL2DZ quantum of charge transfer from diene to dienophile<sup>a</sup>

| 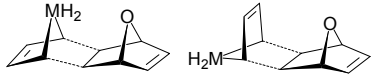 |    |                 |                  |  |       |                 |                  |
|-----------------------------------------------------------------------------------|----|-----------------|------------------|-------------------------------------------------------------------------------------|-------|-----------------|------------------|
| R=H                                                                               |    |                 |                  | R=H                                                                                 |       |                 |                  |
| TS                                                                                | M  | <i>exo,exo-</i> | <i>exo,endo-</i> | TS                                                                                  | M, L  | <i>exo,exo-</i> | <i>exo,endo-</i> |
| <b>1</b>                                                                          | C  | -0.071          | -0.067           | <b>9</b>                                                                            | C     | -0.090          | -0.054           |
| <b>2</b>                                                                          | Si | 0.017           | 0.128            | <b>10</b>                                                                           | Si    | 0.045           | 0.035            |
| <b>3</b>                                                                          | Ge | 0.005           | 0.009            | <b>11</b>                                                                           | Si Ge | 0.049           | 0.055            |
| <b>4</b>                                                                          | Sn | 0.030           | 0.002            | <b>12</b>                                                                           | Ge    | 0.040           | 0.041            |
| R=CH <sub>3</sub>                                                                 |    |                 |                  | R=CH <sub>3</sub>                                                                   |       |                 |                  |
| <b>5</b>                                                                          | C  | -0.072          | -0.071           | <b>13</b>                                                                           | C     | -0.082          | -0.080           |
| <b>6</b>                                                                          | Si | 0.009           | 0.007            | <b>14</b>                                                                           | Si    | 0.003           | 0.001            |
| <b>7</b>                                                                          | Ge | 0.007           | 0.007            | <b>15</b>                                                                           | Si Ge | 0.010           | 0.024            |
| <b>8</b>                                                                          | Sn | 0.018           | 0.028            | <b>16</b>                                                                           | Ge    | 0.004           | 0.011            |

<sup>a</sup>Negative numbers = electron transfer from diene to dienophile (normal el. demand)

**Table S12.** Comparison of the length of the forming bond lengths (in Å) in **TS1-16** calculated with the B3LYP/LANL2DZ and AM1 methods.

| 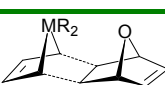 |    |                 |              |                  |  |           |        |                 |              |  |              |  |  |  |  |  |  |  |  |
|-----------------------------------------------------------------------------------|----|-----------------|--------------|------------------|-----------------------------------------------------------------------------------|-----------|--------|-----------------|--------------|-------------------------------------------------------------------------------------|--------------|--|--|--|-------------------------------------------------------------------------------------|--|--|--|--|
| <i>R=H</i>                                                                        |    |                 |              |                  | <i>R=H</i>                                                                        |           |        |                 |              |                                                                                     |              |  |  |  |                                                                                     |  |  |  |  |
| TS                                                                                | M  | <i>exo,exo-</i> |              | <i>exo,endo-</i> |                                                                                   | TS        | M,L    | <i>exo,exo-</i> |              | <i>exo,endo-</i>                                                                    |              |  |  |  |                                                                                     |  |  |  |  |
|                                                                                   |    | B3LYP           | AM1          | B3LYP            | AM1                                                                               |           |        | B3LYP           | AM1          | B3LYP                                                                               | AM1          |  |  |  |                                                                                     |  |  |  |  |
| <b>1</b>                                                                          | C  | 2.310; 2.347    | 2.155; 2.155 | 2.296; 2.298     | 2.141; 2.142                                                                      | <b>9</b>  | C      | 2.360; 2.361    | 2.171; 2.172 | 2.344; 2.345                                                                        | 2.161; 2.161 |  |  |  |                                                                                     |  |  |  |  |
| <b>2</b>                                                                          | Si | 2.353; 2.356    | 2.155; 2.156 | 2.324; 2.325     | 2.131; 2.135                                                                      | <b>10</b> | Si     | 2.385; 2.392    | 2.181; 2.183 | 2.345; 2.386                                                                        | 2.166; 2.167 |  |  |  |                                                                                     |  |  |  |  |
| <b>3</b>                                                                          | Ge | 2.301; 2.414    | 2.161; 2.163 | 2.323; 2.332     | 2.143; 2.146                                                                      | <b>11</b> | Si, Ge | 2.377; 2.398    | 2.076; 2.312 | 2.324; 2.434                                                                        | 2.121; 2.228 |  |  |  |                                                                                     |  |  |  |  |
| <b>4</b>                                                                          | Sn | 2.371; 2.402    | 2.167; 2.168 | 2.324; 2.327     | 2.153; 2.155                                                                      | <b>12</b> | Ge     | 2.385; 2.400    | 2.186; 2.188 | 2.365; 2.391                                                                        | 2.177; 2.178 |  |  |  |                                                                                     |  |  |  |  |
| <i>R=CH<sub>3</sub></i>                                                           |    |                 |              |                  | <i>R=CH<sub>3</sub></i>                                                           |           |        |                 |              |                                                                                     |              |  |  |  |                                                                                     |  |  |  |  |
| <b>5</b>                                                                          | C  | 2.326; 2.337    | 2.165; 2.170 | 2.325; 2.339     | 2.151; 2.155                                                                      | <b>13</b> | C      | 2.336; 2.409    | 2.183; 2.195 | 2.311; 2.404                                                                        | 2.168; 2.177 |  |  |  |                                                                                     |  |  |  |  |
| <b>6</b>                                                                          | Si | 2.326; 2.405    | 2.123; 2.140 | 2.133; 2.333     | 2.133; 2.146                                                                      | <b>14</b> | Si     | 2.401; 2.402    | 2.178; 2.190 | 2.360; 2.397                                                                        | 2.168; 2.168 |  |  |  |                                                                                     |  |  |  |  |
| <b>7</b>                                                                          | Ge | 2.361; 2.378    | 2.161; 2.163 | 2.339; 2.342     | 2.143; 2.144                                                                      | <b>15</b> | Si Ge  | 2.300; 2.463    | 2.087; 2.301 | 2.338; 2.419                                                                        | 2.119; 2.230 |  |  |  |                                                                                     |  |  |  |  |
| <b>8</b>                                                                          | Sn | 2.370; 2.400    | 2.167; 2.176 | 2.334; 2.348     | 2.158; 2.159                                                                      | <b>16</b> | Ge     | 2.403; 2.403    | 2.187; 2.190 | 2.384; 2.388                                                                        | 2.174; 2.176 |  |  |  |                                                                                     |  |  |  |  |
